# Supplementary material
Source: PubMed Central journal article supplement (PMC2663921)
Supplement: E08-11-1149_1.pdf [file E08-11-1149_1.pdf]

## Supplemental Figure Legends

**Supplemental Figure 1.** MT1-MMP gelatinolytic activity was observed in the soluble phase of detergent lysates and present in a number of MT1-MMP-expressing cell lines.

(A) HT1080 cell lysates (1% Brij 99) was centrifuged at 100,000 g where indicated and immunoprecipitated with anti-CD81 or anti-MHC I antibodies. Eluates were analyzed by gelatin zymography. (B) MDA-MB-231, HeLa, BT549, 293, U87, LN827, MCF-7, NT2, A549 and K562 cells were lysed in 1% Brij 99 lysis buffer and immunoprecipitated using an anti-tetraspanin cocktail (TSPAN: CD9, CD63, CD81, CD82, CD151 and TSPAN4), anti-CD81, or anti-MHC I and the eluates analyzed by gelatin zymography. MMP-2 standard (std) was loaded on the gel as a gelatinolytic control enzyme. pMMP-2: pro-MMP-2, aMMP-2: active MMP-2.

**Supplemental Figure 2.** Detergent specificity analysis of the MT1-MMP-tetraspanin associations. (A) MDA-MB-231 cells were lysed with the indicated detergent lysis buffers and immunoprecipitated with anti-CD9 or anti-MHC I antibodies. Eluates were analyzed by gelatin zymography and western blotting for MT1-MMP (AB815 antibody). (B) HT1080 cells transfected with MT1-MMP-GFP (MT1-GFP) or TSPAN12-FLAG were lysed in 1% Brij 96 lysis buffer and immunoprecipitated with anti-FLAG or anti-GFP antibodies. In addition, equal amounts of both HT1080-MT1-GFP and HT1080-TSPAN12-FLAG lysates were mixed in a 1:1 ratio after lysis and immunoprecipitated as above. Eluates were analyzed by gelatin zymography or western blotting probed for FLAG, GFP or MT1-MMP (AB815 antibody). pMMP-2: pro-MMP-2, aMMP-2: active MMP-2, n.s.: non-specific, std: MMP-2 standard.

**Supplemental Figure 3.** Confirmation of tetraspanin knockdown. (A) MCF-7-VC or MCF-7-MT1 cells were transfected with the indicated siRNAs. Lysates were collected 4 days after siRNA transfection and western blot performed for CD9, CD81 and actin. (B) RNA was also collected 2 days after siRNA transfection and RT-PCR performed for TSPAN12 and GAPDH. Results are expressed as ratio of TSPAN12/GAPDH. (C) HT1080 cells expressing TSPAN12-FLAG were transfected with control or TSPAN12

siRNAs. Lysates were collected 4 days post transfection and western blotting performed for FLAG (TSPAN12 antibodies are currently unavailable) and actin to confirm protein knockdown. (D) RNA was also collected 2 days after siRNA transfection and RT-PCR performed to confirm TSPAN12 knockdown in HT1080 cells relative to GAPDH.

**Supplemental Figure 4.** Tetraspanin effects on MT1-MMP activity in cells grown in collagen gels. MCF-7-MT1 and MCF-7-VC cells were treated for 2 days with siRNAs, and then cells were embedded within collagen gels for the indicated times. The % area of cell coverage was determined to yield mean +/- S.D. (N=3, \*, P<0.05; \*\*, P<0.005 compared to control at each time point).

**Supplemental Figure 5.** Tetraspanin knockdown does not increase MT1-MMP internalization. An MT1-MMP cell surface internalization assay was performed on MCF-7-MT1-GFP cells transfected with control or CD9/CD81/TSPAN12 (3xTSPAN) siRNAs. Due to the lower total MT1-MMP levels in CD9/CD81/TSPAN12 siRNA treated cells, the internalized MT1-MMP was expressed as a % of internalized from the total initial amount on the cell surface. The slope indicating the internalization rate is similar in both cases. Similar results were also obtained for MCF-7-MT1 cells.

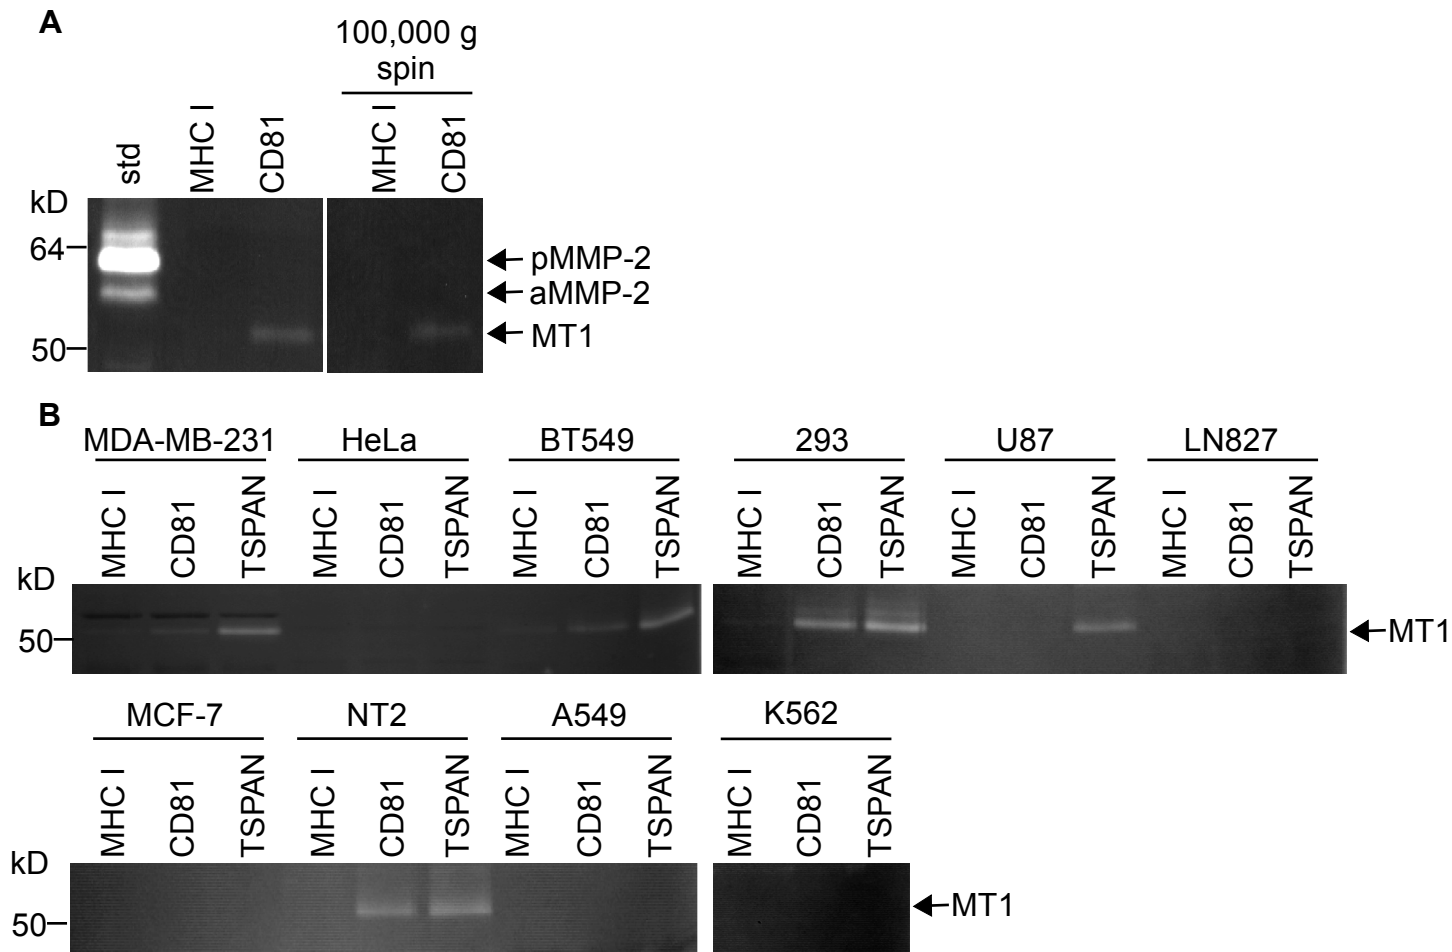

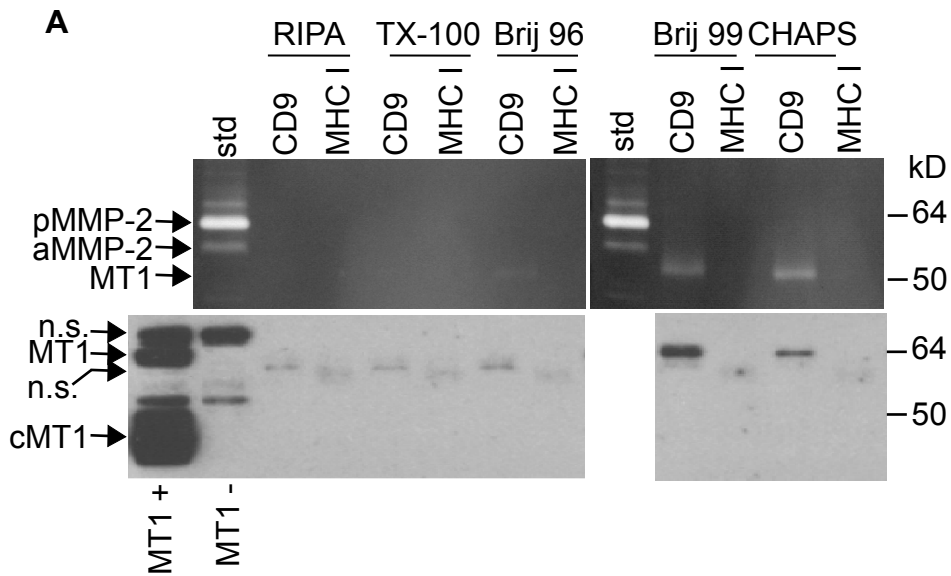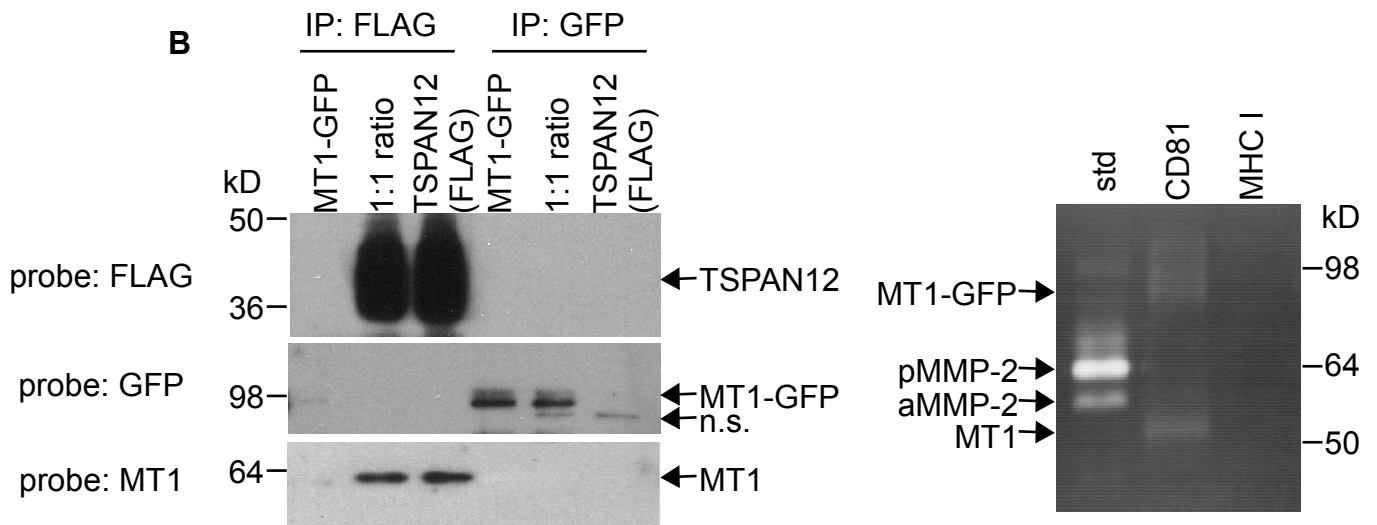

**A**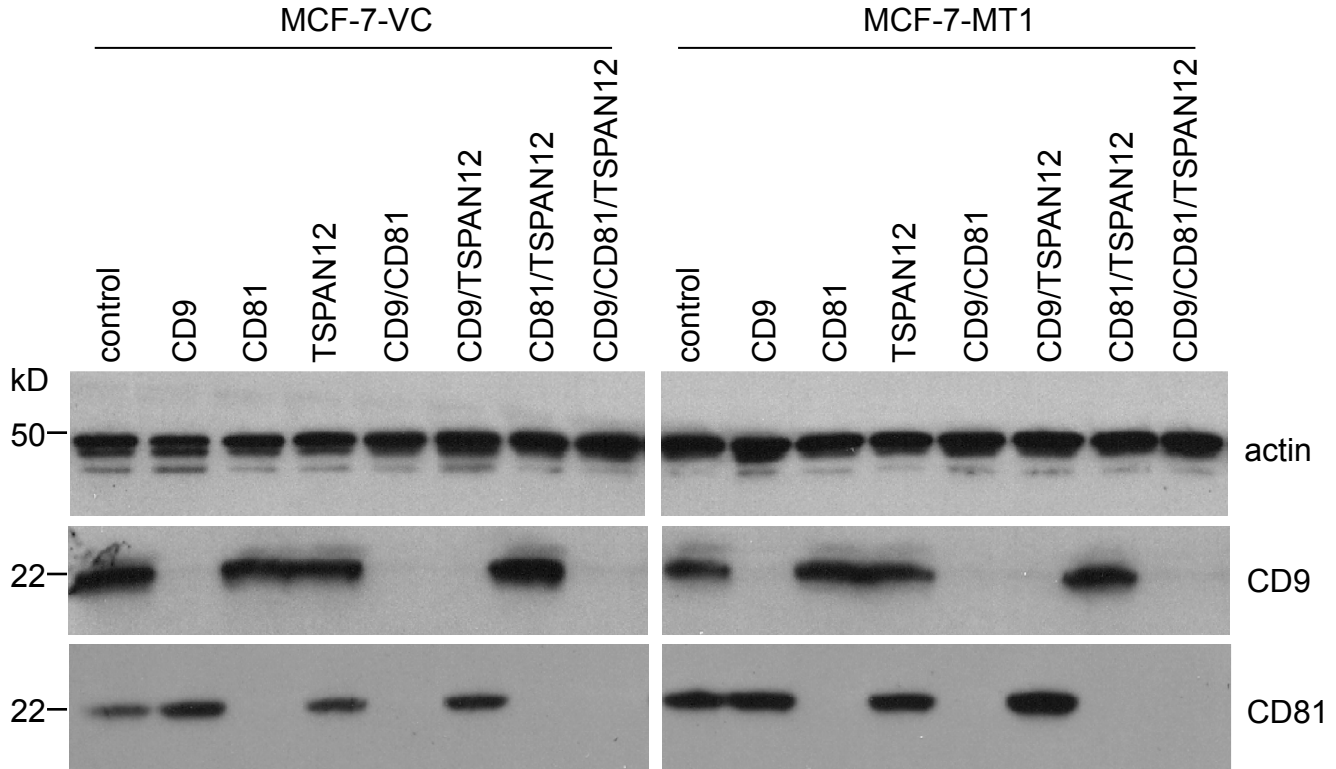**B**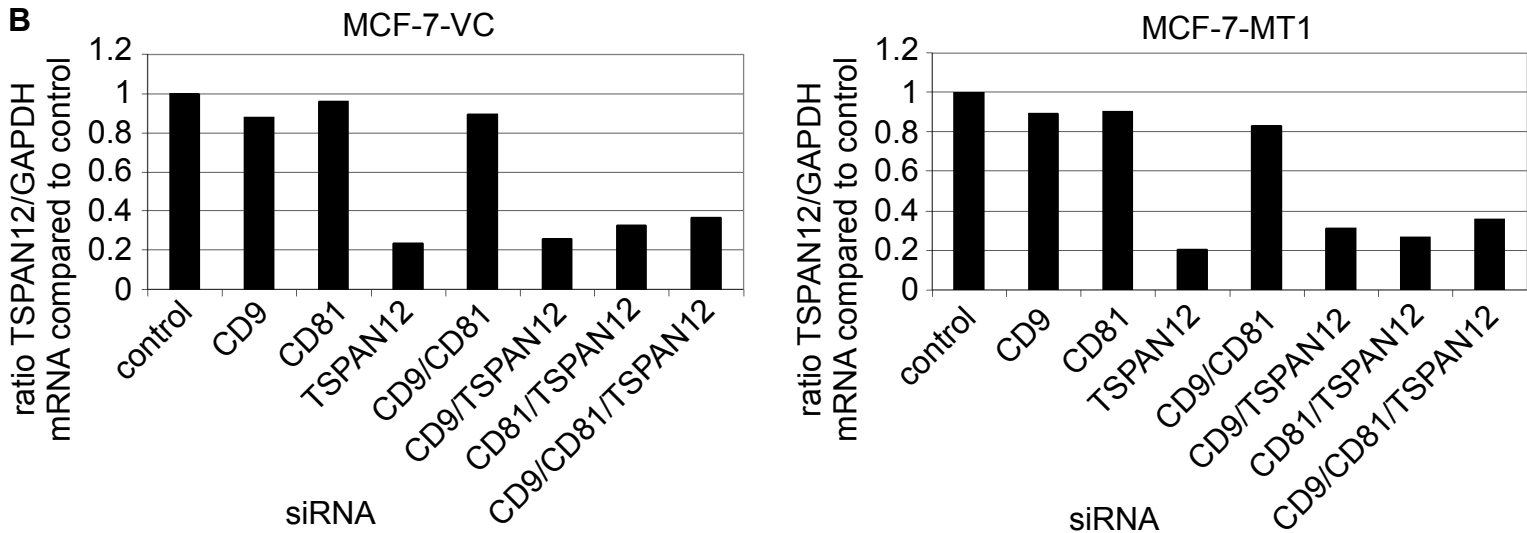**C**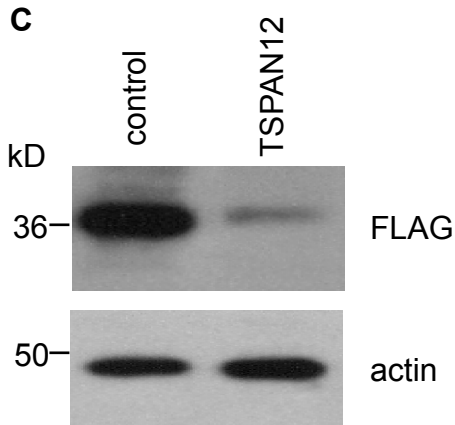**D**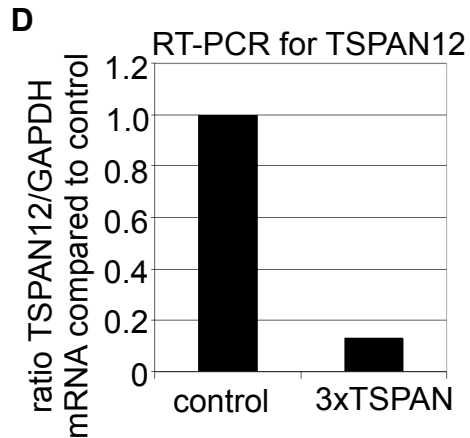



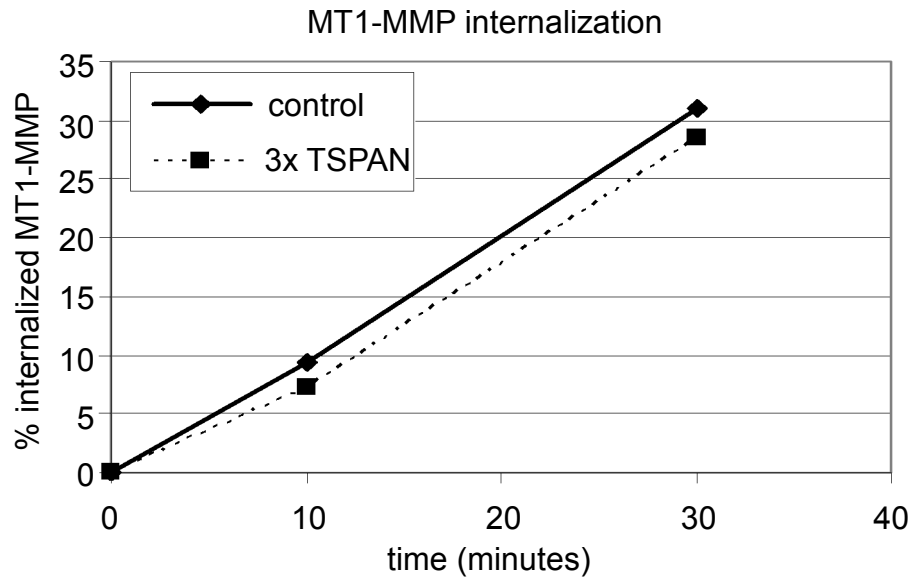

Cell surface expression of tetraspanins and other proteins by  
flow cytometry on MCF-7-MT1, HT1080 and MDA-MB-231 cells

| <b><u>MCF-7-MT1</u></b> | <b><u>MFI *</u></b> | <b><u>HT1080</u></b> | <b><u>MFI</u></b> | <b><u>MDA-MB-231</u></b> | <b><u>MFI</u></b> |
|-------------------------|---------------------|----------------------|-------------------|--------------------------|-------------------|
| neg. control            | 6                   | neg. control         | 3                 | neg. control             | 4                 |
| CD9                     | 935                 | CD9                  | 3                 | CD9                      | 526               |
| CD63                    | 603                 | CD63                 | 274               | CD63                     | 406               |
| CD81                    | 704                 | CD81                 | 1414              | CD81                     | 536               |
| CD82                    | 140                 | CD82                 | 69                | CD82                     | 218               |
| CD151                   | 378                 | CD151                | 842               | CD151                    | 616               |
| TSPAN4                  | 68                  | TSPAN4               | 145               | TSPAN4                   | 222               |
| MHC I                   | 167                 | MHC I                | 492               | MHC I                    | 916               |
| CD147                   | 345                 | CD147                | 1857              | CD147                    | 954               |

\* indicates mean fluorescence intensity (MFI) of each protein



Relative MT1-MMP recovery following CD9, CD81 or TSPAN12 immunoprecipitation (IP) in the indicated cell lines and indicated lysis buffers. A representative zymogram/western blot for MT1-MMP is shown in supplemental Fig. 2A.

| Cell type and IP                     | RIPA | TX-100 | Brij 96 | Brij 99 | CHAPS |
|--------------------------------------|------|--------|---------|---------|-------|
| MCF-7-MT1<br>IP: CD81                | -    | -      | -       | +++     | +++   |
| HT1080<br>IP: CD81                   | -    | -      | -       | +++     | +++   |
| MDA-MB-231<br>IP: CD9                | -    | -      | +       | +++     | +++   |
| HT1080-TSPAN12<br>IP: FLAG (TSPAN12) | -    | +      | +++     | +++     | +++   |

Two distinct sets of tetraspanin siRNAs similarly reduced MT1-MMP protein expression analyzed by flow cytometry. Mean Fluorescent Intensity (MFI) values are indicated for MT1-MMP, CD9 and CD81. Confirmation of TSPAN12 knockdown was performed by RT-PCR.

|                                | MFI        |            |             | <u>ratio TSPAN12/actin</u><br><u>compared to control</u> |
|--------------------------------|------------|------------|-------------|----------------------------------------------------------|
|                                | <b>MT1</b> | <b>CD9</b> | <b>CD81</b> | <b>TSPAN12</b>                                           |
| neg. control                   | 7.8        | 2.3        | 8.4         | -                                                        |
| control siRNA                  | 49.0       | 1016       | 1741        | 1                                                        |
| CD9/CD81/TSPAN12 siRNA (set 1) | 24.6       | 575        | 480         | 0.06                                                     |
| CD9/CD81/TSPAN12 siRNA (set 2) | 26.4       | 569        | 1120        | 0.16                                                     |
